# Supplementary material for: Increased Abscess Formation and Defective Chemokine Regulation in CREB Transgenic Mice
Source: PubMed Central journal article supplement (PMC3566130; doi:10.1371/journal.pone.0055866), 2013-02-06
Supplement: pone.0055866.s001.pdf [file pone.0055866.s001.pdf]

Figure S1A

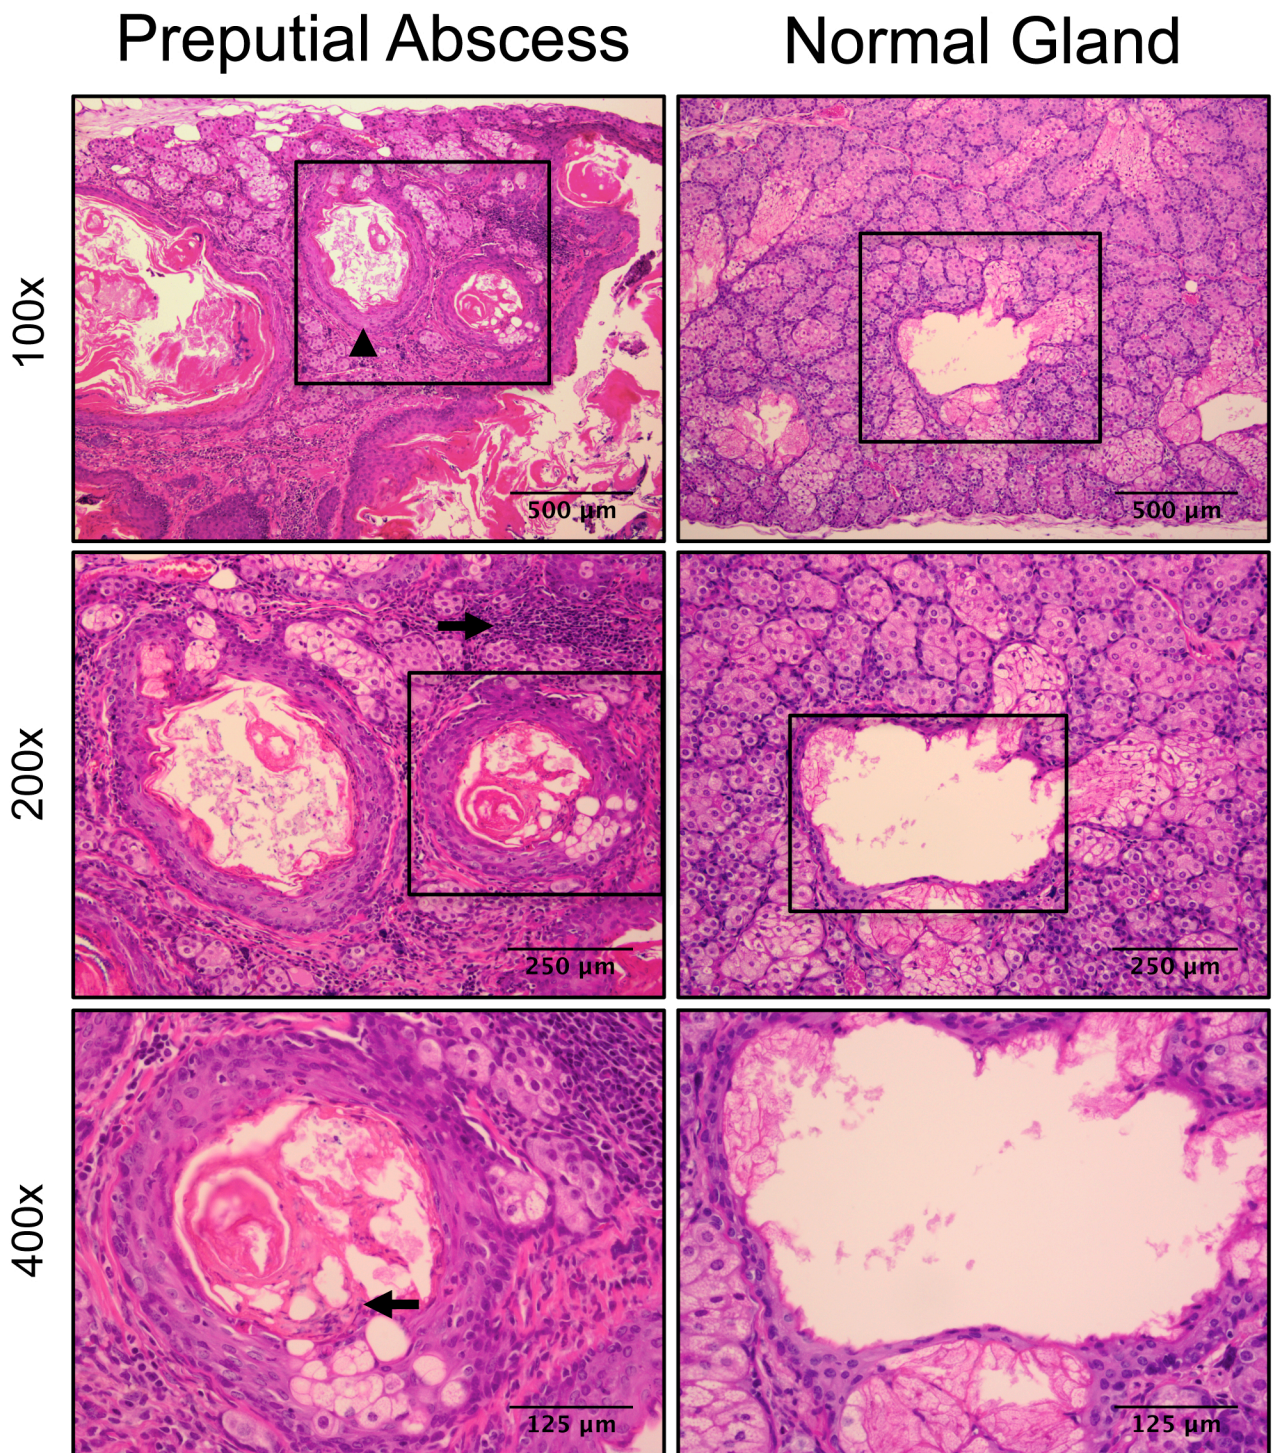

Figure S1B

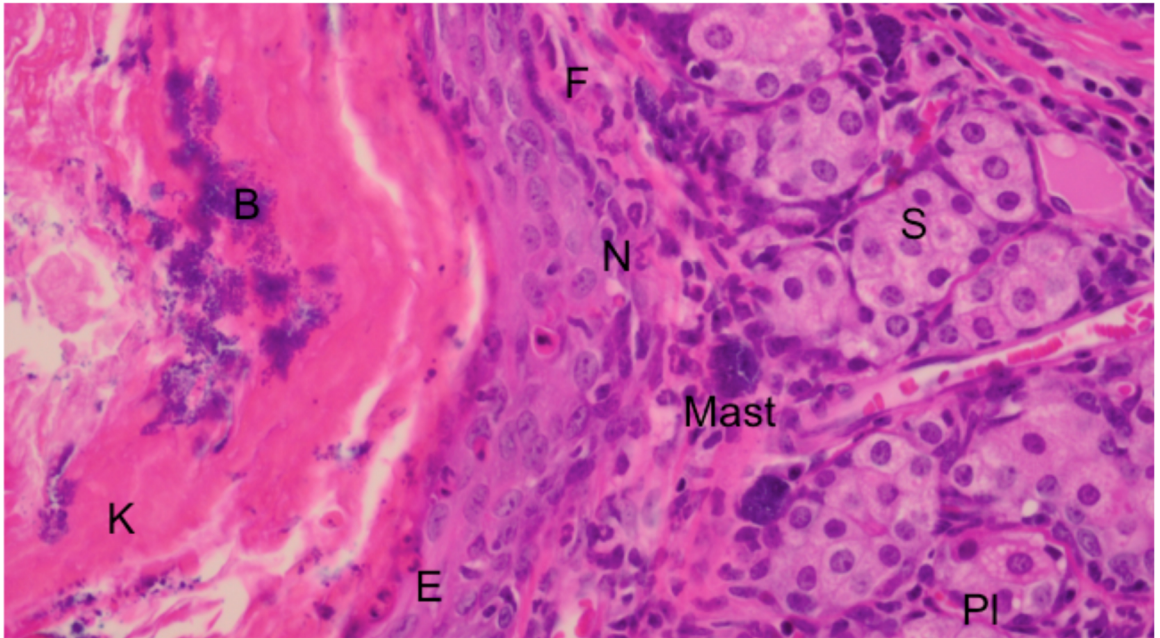

Figure Legend. Representative mouse with abscess of the preputial gland.

Preputial Abscess, 500X magnification. Key:

B=Bacteria

K=Keratin production inspissated within the ducts

E=Hyperplastic duct squamous epithelium

F=Fibrosis, concentric (chronic inflammatory changed)

N=Transmigrating and migrated neutrophils

S=Sebaceous glands

PI=Plasma cells
